# Supplementary material
Source: PubMed Central journal article supplement (PMC2669339)
Supplement: 0901940106_0901940106SI.pdf [file 0901940106_0901940106SI.pdf]

# Supporting Information

Hou et al. 10.1073/pnas.0901940106

## SI Text

**Gene Constructs and Rice Transformation.** The *OsSKIPa*-overexpression construct (S58S) was constructed by directionally inserting the full cDNA sequence first into the entry vector pDONR207 and then into the destination vector pCB2004H (1) using the Gateway recombination reaction (Invitrogen). To make a dsRNAi construct of *OsSKIPa* (S59R), a 570-bp fragment of *OsSKIPa* (nucleotides 1534–2104) was generated by PCR with primers *SKIP*-RNAi and was cloned into pHellsgate2 (2) through *attB* × *attP* (BP) recombination cloning. The *attB1* and *attB2* are the 2 sequences for the BP recombination reaction (Invitrogen). The constructs were transformed into the *japonica* rice cv. Zhonghua 11 by the *Agrobacterium*-mediated transformation method (3).

**Plant Growth, Stresses Treatment, and Measurement.** Rice seeds of cultivar Zhenshan 97 (*O. sativa* L. ssp. *indica*) were germinated and grown in Hoagland hydroponic culture medium for 18–20 days under normal growth conditions for rice. To measure the expression level of the *OsSKIPa* gene under various stresses, plants at the 4-leaf stage were treated with abiotic stresses, including drought (removing the water supply from the plants for the designated time), salt (addition of 200 mM NaCl in the hydroponic culture medium), cold (exposing plants to 4 °C for the designated time), wounding (crushing rice leaves with a hemostat), and phytohormones (100 μM ABA, 450 μM kinetin, 100 μM gibberellic acid, 50 μM indole-3-acetic acid, 100 μM jasmonic acid, 1 mM salicylic acid, 1 mM ethephon, or 10 μM brassinosteroid).

Positive transgenic plants of S58S T<sub>1</sub> or T<sub>2</sub> families were selected by germinating seeds on MS medium containing 50 mg/L hygromycin. After germination, the positive seedlings were transplanted in MS medium containing 3 μM ABA, 150 mM NaCl, or 200 mM mannitol and grown for 10 days. S58S transgenic plants (at the 4-leaf stage) growing in sandy soil were drought-stressed (no watering for 7 days), followed by recovery. The drought stress at the panicle development stage was applied to plants growing in PVC tubes (1-m height, 20-cm diameter) by following the protocol of Yue et al. (4); genotypes of the plants were checked by PCR using hygromycin resistance gene-specific primers. Each stress test was repeated 3 or 4 times.

SOD activity was determined according to the methods described previously (5). The reaction mixture consists of 50 mM potassium phosphate (pH 7.8), 13 mM methionine, 0.01 mM EDTA, 0.002 mM riboflavin, and 0.075 mM nitroblue tetrazolium. SOD activity was determined by monitoring the inhibition of the reduction rate of nitroblue tetrazolium in the reaction mixture and the control without protein extract at 560 nm.

**Gene Expression Analysis.** Total RNA was isolated from rice leaves using TRIzol reagent (Invitrogen). For RNA gel blotting, 15 μg of total RNA from each sample was separated on a 1.2% (vol/vol) agarose gel containing 1% formaldehyde and then transferred onto a nylon membrane. The RNA gel blot was hybridized with α-<sup>32</sup>P-dCTP-labeled *OsSKIPa* gene-specific probe overnight using modified Church buffer [7% SDS (wt/vol), 0.5 M phosphate buffer (pH 7.2), 10 mM EDTA] at 65 °C. Blots were washed using 2× SSC/0.1% SDS for 10 min at 65 °C. The blot was briefly air-dried and then subjected to radiography.

Real-time quantitative RT-PCR was performed on a 7500 Real-Time PCR System (Applied Biosystems) using SYBR Green PCR Master Mix Reagent (Applied Biosystems). Rice

*Actin1* gene was used as the endogenous control. The relative expression levels were determined as described previously (6).

**Western Blot Analysis.** Nuclear protein (15 μg) was separated on 10% (vol/vol) SDS/PAGE gels and transferred to polyvinylidene difluoride membrane, followed by Western blot analysis. In brief, 2% (wt/vol) BSA in PBS containing 0.05% Tween 20 was used to block nonspecific binding. The blot was subsequently incubated with anti-*OsSKIPa* rabbit polyclonal antibody (New-East Biosciences) and with secondary antibody (SouthernBiotech). After antibody incubation, blots were extensively washed in PBS. An ECL kit (Pierce) was used for detection according to the manufacturer's instructions.

**Yeast Two-Hybrid Screening and GST Pull-Down Assay.** The yeast two-hybrid assay was performed using the ProQuest Two-Hybrid System (Invitrogen). The coding region of *OsSKIPa* was amplified with primers *SKIP*-Y2H. The PCR product was cloned into the entry vector pDONR221 using the BP reaction and then into the vector pDEST32 using the *attL* × *attR* reaction to generate bait vector with *OsSKIPa* fused to the *GAL4* DNA binding domain. A prey cDNA library of rice was constructed by fusing cDNAs with the *GAL4* activation domain in the pEXP-AD502 vector (Invitrogen) according to the manufacturer's instructions. The yeast strain Mav203 (*MATα*; *leu2-3,112*; *trp1-901*; *his3Δ200*; *ade2-101*; *gal4Δ*; *gal80Δ*; *SPAL10::URA3*; *GAL1::lacZ*; *HIS3<sub>UAS</sub>* *GAL1::HIS3@LYS2*; *can1<sup>R</sup>*; *cyh2<sup>R</sup>*) was transformed with the bait plasmid, and the cells containing the bait were transformed with the plasmid DNA of the prey cDNA library according to the method described previously (7). A total of 2.75 × 10<sup>5</sup> transformants were selected on synthetic complete selection medium containing 15 mM 3-AT (3-amino-1, 2, 4-Triazole) and lacking Leu, Trp, and His. Large yeast clones appearing within 7 days were picked out for testing of the LacZ reporter gene. Positive clones were isolated and cotransformed with pDEST32 to test their self-activation activities.

The cDNAs of *OsSKIPa*-interacting proteins identified from yeast two-hybrid assay were constructed in fusion with N-terminal GST tag in pDEST15 (Invitrogen) through recombination reactions with pDONR221 (Invitrogen) as an entry vector. The GST fusion proteins were expressed in *Escherichia coli* strain BL-21 for GST pull-down assay. The same fragment of *OsSKIPa* as used in the yeast two-hybrid assay was cloned into pDEST17 for expression of <sup>35</sup>[S]-labeled *OsSKIPa* protein. The GST pull-down assay was performed using the MagneGST Pull-Down System (Promega) according to the manufacturer's instructions.

**Microscopic and in Situ Hybridization Analyses.** The shoots and roots of S58S and S59R plants were collected 10 days after germination and fixed in FAA (50% (vol/vol) ethanol, 5% (vol/vol) acetic acid, 3.7% (vol/vol) formaldehyde). The procedures of dehydration, clearing, infiltration, and embedding were carried out as described by Dai et al. (8). The microtome sections (8 μm) were stained with Safranin and Fast Green before mounting on glass slides for imaging.

A TUNEL assay was performed according to the manufacturer's instructions (Takara). The FITC signals were observed in a fluorescence microscope equipped with a CCD (Leica).

The cDNA of N-terminal *OsSKIPa* was constructed in frame with the C-terminal of GFP in the CaMV 35S-GFP-NOS cassette vector. Plasmid DNA was precipitated onto gold par-







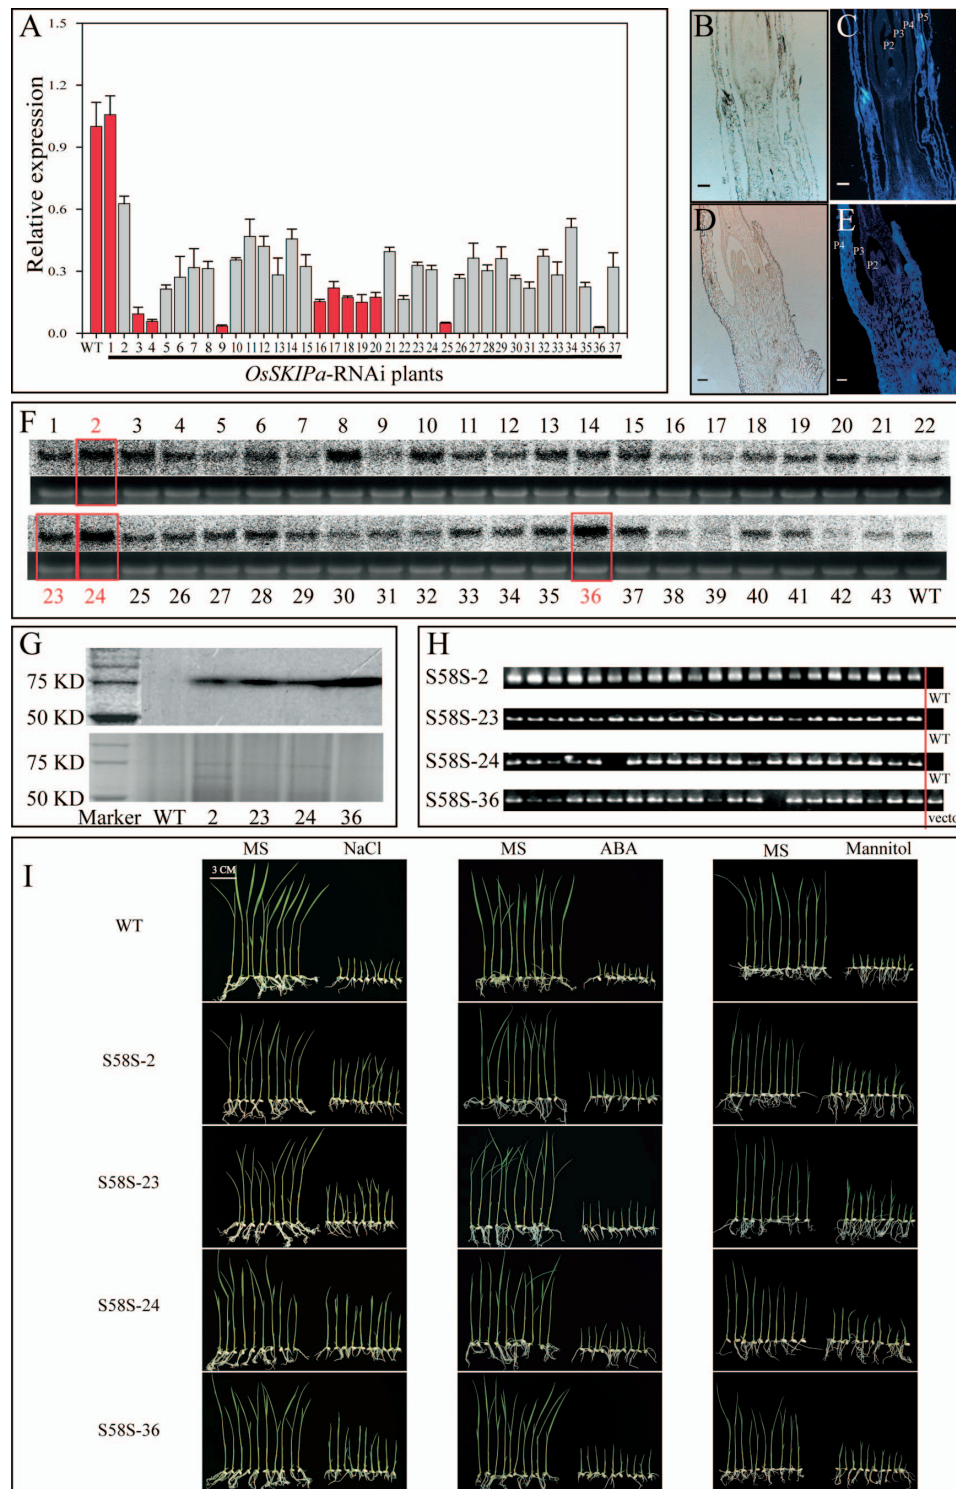

**Fig. S2.** Expression level of *OsSKIPa* in the *OsSKIPa*-suppressed (S59R) and *OsSKIPa*-overexpressed (S58S) plants and the performance of the transgenic plants. (A) The relative expression level of *OsSKIPa* in the T<sub>0</sub> generation transgenic plants (1–37) was compared with WT by real-time PCR analysis. Transgenic line 1 was used as negative control. The lines used for further analysis are labeled in red. TUNEL assay of WT (B and C) and S59R (D and E) seedling sections. (B and D) Image in light field. More TUNEL-positive cells are found in the leaf primordia and hypocotyl of S59R (E) than in WT (C). P2–P5: leaf primordia. Bars = 100  $\mu$ m. (F) RNA gel blot analysis of the *OsSKIPa*-overexpressed plants. The 4 lines used for further analysis are labeled with red rectangles. (G) Western blot analysis of the *OsSKIPa*-overexpressed (S58S) plants using anti-*OsSKIPa* antibody. (H) Positive check of *OsSKIPa*-overexpressed (S58S) plants. Positive transgenic plants of S58S T<sub>1</sub> or T<sub>2</sub> families were selected by germinating seeds on MS medium containing 50 mg/L hygromycin, and the genotypes of the plants were then confirmed by PCR. (I) Performance of 4 independent *OsSKIPa*-overexpressing transgenic lines (S58S-2, S58S-23, S58S-24, and S58S-36) in MS medium containing 3  $\mu$ M ABA, 150 mM NaCl, or 200 mM mannitol.





**Table S1. Growth performance of the *OsSKIPa*-suppressed plants (S59R)**

| Line <sup>†</sup> | N <sup>‡</sup> | Shoot height (cm) <sup>§</sup> | Root length (cm) <sup>¶</sup> | Leaf grow rate <sup>  </sup> | Leaf no. (20 DAG) | Growth rate (cm·d <sup>-1</sup> ) <sup>††</sup> | Biomass (g)     | Tiller no. <sup>††</sup> |
|-------------------|----------------|--------------------------------|-------------------------------|------------------------------|-------------------|-------------------------------------------------|-----------------|--------------------------|
| S59R-3            | 15             | 18.7 ± 3.2**                   | 3.8 ± 0.4**                   | 0.19 ± 0.03**                | 3.0 ± 0.5**       | 0.9 ± 0.2*                                      | 26.45 ± 6.89**  | 9.0 ± 2.3*               |
| S59R-4            | 15             | 18.7 ± 1.7**                   | 5.0 ± 0.4**                   | 0.20 ± 0.02**                | 3.5 ± 0.3**       | 0.7 ± 0.1**                                     | 43.47 ± 19.11*  | 12.0 ± 2.0*              |
| S59R-9            | 16             | 21.2 ± 2.6**                   | 4.3 ± 0.3**                   | 0.19 ± 0.03**                | 3.0 ± 0.5**       | 1.0 ± 0.2*                                      | 50.02 ± 12.84** | 15.3 ± 4.7**             |
| S59R-16           | 16             | 23.3 ± 1.8**                   | 4.6 ± 0.3**                   | 0.27 ± 0.02*                 | 4.3 ± 0.4*        | 1.1 ± 0.1*                                      | 46.01 ± 5.45**  | 12.3 ± 1.3*              |
| S59R-17           | 16             | 26.2 ± 1.9*                    | 4.9 ± 0.4**                   | 0.23 ± 0.03**                | 4.2 ± 0.4*        | 1.2 ± 0.1                                       | 44.78 ± 5.97**  | 12.3 ± 1.6*              |
| S59R-18           | 16             | 18.3 ± 2.0**                   | 4.6 ± 0.3**                   | 0.25 ± 0.02**                | 3.9 ± 0.3**       | 0.9 ± 0.1**                                     | 30.82 ± 4.74**  | 7.7 ± 1.1**              |
| S59R-19           | 16             | 19.4 ± 2.7**                   | 4.3 ± 0.5**                   | 0.21 ± 0.03**                | 3.4 ± 0.5**       | 1.0 ± 0.2*                                      | 42.95 ± 8.12*   | 10.0 ± 1.9*              |
| S59R-20           | 14             | 21.6 ± 1.9**                   | 5.0 ± 0.5**                   | 0.23 ± 0.02**                | 3.7 ± 0.3**       | 1.1 ± 0.1*                                      | 30.88 ± 2.08**  | 8.0 ± 0.6*               |
| S59R-25           | 12             | 27.4 ± 2.2                     | 5.1 ± 0.4**                   | 0.24 ± 0.03**                | 4.1 ± 0.5*        | 1.1 ± 0.1*                                      | 14.85 ± 4.51**  | 6.8 ± 1.7**              |
| WT                | 24             | 30.9 ± 1.3                     | 7.4 ± 0.4                     | 0.30 ± 0.01                  | 4.8 ± 0.1         | 1.4 ± 0.1                                       | 78.96 ± 8.18    | 18.9 ± 2.0               |
| NC                | 15             | 30.1 ± 1.3                     | 5.8 ± 0.5                     | 0.29 ± 0.01                  | 4.8 ± 0.1         | 1.3 ± 0.1                                       | 74.90 ± 8.08    | 18.9 ± 2.0               |

The data on shoot height, root length, leaf number, growth rate, and tiller number are shown as mean ± SE. DAG, days after germination; NC, negative transgenic control. \**t* test, *P* < 0.05; \*\**t* test, *P* < 0.01.

<sup>†</sup>Relative expression level of *OsSKIPa* is shown in Fig. S2A.

<sup>‡</sup>Number of positive T<sub>1</sub> plants tested.

<sup>§</sup>Length of the shoot at 30 DAG.

<sup>¶</sup>Length of the root at 15 DAG.

<sup>||</sup>Rate of leaf initiation per day at the seedling stage.

<sup>††</sup>Elongation of new leaves per day at seedling stage.

<sup>††</sup>The tiller number at flowering stage.

**Table S2. Enriched *cis*-elements in promoters of the differentially expressed genes in the overexpression (OE) and RNAi transgenic plants**

| Name of <i>cis</i> -element | Motif        | Count* | Exp <sup>†</sup> | P value | TF <sup>‡</sup> | Stimulus/Tissue <sup>§</sup> |
|-----------------------------|--------------|--------|------------------|---------|-----------------|------------------------------|
| ACGT element                |              |        |                  |         |                 |                              |
| ACGTATERD1                  | ACGT         | 727    | 600              | 0.00    | ERD1            | Light                        |
| ABRELATERD1                 | ACGTG        | 235    | 180              | 0.00    | NACR            | Drought                      |
| ACGTABREMOTIFA2OSEM         | ACGTGKC      | 41     | 27               | 0.01    |                 | ABA, drought                 |
| BOXIIPCCHS                  | ACGTGGC      | 27     | 16               | 0.01    | bZIP            | ABA                          |
| ABREATCONSENSUS             | YACGTGGC     | 15     | 9                | 0.02    | ABF/bZIP        | ABA                          |
| ACGTTBOX                    | ACGTT        | 52     | 39               | 0.03    |                 |                              |
| TGACGTVMAMY                 | TGACGT       | 56     | 37               | 0.00    |                 | Seed                         |
| ACGTABOX                    | TACGTA       | 79     | 47               | 0.00    |                 | Sugar (repression)           |
| Core <i>cis</i> -elements   |              |        |                  |         |                 |                              |
| CCAATBOX1                   | CCAAT        | 310    | 279              | 0.04    |                 |                              |
| -300ELEMENT                 | TGHAAARK     | 149    | 127              | 0.02    |                 |                              |
| TATABOX3                    | TATTAAT      | 79     | 61               | 0.01    |                 |                              |
| TATABOX4                    | TATATAA      | 105    | 77               | 0.00    |                 |                              |
| TATABOXOSPAL                | TATTTAA      | 86     | 67               | 0.02    | OsTBP2          |                              |
| Other <i>cis</i> -elements  |              |        |                  |         |                 |                              |
| IBOXCORE                    | GATAA        | 362    | 320              | 0.01    |                 | Light                        |
| GATABOX                     | GATA         | 1,113  | 1,028            | 0.01    |                 |                              |
| ASF1MOTIFCAMV               | TGACG        | 187    | 153              | 0.01    | ASF             | Stress, auxin, Ammonium      |
| AMMORESIIUDCRNIA1           | GGWAGGGT     | 11     | 6                | 0.02    |                 |                              |
| DOFCOREZM                   | AAAG         | 1,616  | 1,505            | 0.01    | Dof             |                              |
| GAGA8HVBKN3                 | (GA)8        | 25     | 9                | 0.01    |                 |                              |
| GAGAGMGSA1                  | (GA)9        | 20     | 6                | 0.01    |                 |                              |
| MARARS                      | WTTTATRITTTW | 18     | 10               | 0.01    |                 |                              |
| MYCCONSENSUSAT              | CANNTG       | 1,283  | 1,187            | 0.01    | MYC             | ABA, cold                    |
| NAPINMOTIFBN                | TACACAT      | 39     | 29               | 0.03    |                 | Seed                         |
| NTBBF1ARROLB                | ACTTTA       | 134    | 99               | 0.00    | Dof             | Auxin                        |
| POLASIG2                    | AATTAAA      | 109    | 83               | 0.01    |                 |                              |
| ROOTMOTIFTAPOX1             | ATATT        | 903    | 769              | 0.00    |                 |                              |
| RYREPEATGMGY2               | CATGCAT      | 66     | 49               | 0.01    |                 |                              |
| RYREPEATLEGUMINBOX          | CATGCAY      | 88     | 70               | 0.03    |                 | Seed                         |
| TAAAGSTKST1                 | TAAAG        | 326    | 284              | 0.01    |                 | Guard cell                   |

\*Actual number of the motif existing in the 500-bp region upstream of the transcription start site.

<sup>†</sup>Average expected (Exp) number of the motif for 1,000 randomly selected genes.

<sup>‡</sup>Predicted or evidenced transcription factor (TF) binding to the *cis*-element.

<sup>§</sup>To which stimulus or in which tissue the *cis*-element is responsive or specifically expressed.







**Table S4. Putative SKIP-interaction proteins in different species**

| No.                                         | Accession no.       | Description                                                | Putative domains                                                                                                                                        | Accession no.<br>(homologs in<br>rice) | Identities |
|---------------------------------------------|---------------------|------------------------------------------------------------|---------------------------------------------------------------------------------------------------------------------------------------------------------|----------------------------------------|------------|
| Putative SKIP-interacting proteins (human)  |                     |                                                            |                                                                                                                                                         |                                        |            |
| 1                                           | Q9H118              | ASC 1 complex subunit p100                                 | CUE                                                                                                                                                     | NP_001049312                           | 19%        |
| 2                                           | P12755              | C Ski                                                      | Ski, c-SKLSMAD.bind                                                                                                                                     |                                        |            |
| 3                                           | Q06330              | J kappa-recombination signal-binding protein               | Beta-trefoil, beta-trefoil LAG1, DNA binding, IPT/TIG domain                                                                                            |                                        |            |
| 4                                           | P46531              | Notch 1                                                    | EGF-like domain, ankyrin repeat, Notch (DSL) domain                                                                                                     | NP_001062603                           | 20%        |
| 5                                           | Q9UM47              | Notch3                                                     | EGF-like domain, ankyrin repeat, Notch (DSL) domain                                                                                                     | NP_001062606                           | 21%        |
| 6                                           | Q9Y618              | Nuclear receptor corepressor 2                             | Myb-like DNA-binding domain                                                                                                                             | NP_001054527                           | 10%        |
| 7                                           | 8106 (Entrez gene)  | Poly adenylate-binding protein 2                           |                                                                                                                                                         | NP_001057163                           | 46%        |
| 8                                           | P06400              | Retinoblastoma 1                                           | Retinoblastoma-associated protein A domain, Rb C-terminal domain, retinoblastoma-associated protein B domain                                            | NP_001062372                           | 24%        |
| 9                                           | P28749              | Retinoblastoma-like 1                                      | Retinoblastoma-associated protein A domain, retinoblastoma-associated protein B domain                                                                  | NP_001062372                           | 23%        |
| 10                                          | Q08999              | Retinoblastoma-like 2                                      | Retinoblastoma-associated protein A domain, retinoblastoma-associated protein B domain                                                                  | NP_001062372                           | 22%        |
| 11                                          | P10276              | Retinoic acid receptor alpha                               | Zinc finger, C4 type (2 domains), Hormone_recep Ligand-binding domain of nuclear hormone 7                                                              |                                        |            |
| 12                                          | Q15796              | SMAD, mothers against DPP homolog 2 ( <i>Drosophila</i> )  | MH2 domain                                                                                                                                              |                                        |            |
| 13                                          | P11473              | Vitamin D (1,25-dihydroxyvitamin D <sub>3</sub> ) receptor | Zinc finger, C4 type                                                                                                                                    |                                        |            |
| 14                                          | Q09472              | E1A-binding protein p300                                   | Domain of unknown function, (DUF906), TAZ zinc finger, Creb binding, KIX domain, bromodomain, domain of unknown function (DUF902), zinc finger, ZZ type | NP_001045830                           | 22%        |
| 15                                          | P43355              | MAGE1                                                      | MAGE family                                                                                                                                             | NP_001058903                           | 18%        |
| 16                                          | 4088(Entrez gene)   | SMAD3                                                      | Tubulin-tyrosine ligase family                                                                                                                          |                                        |            |
| 17                                          | Q92769              | Histone deacetylase 2                                      | Histone deacetylase domain 1                                                                                                                            | NP_001057943                           | 60%        |
| 18                                          | 9541(Entrez gene)   | CBF1 interacting corepressor                               |                                                                                                                                                         | NP_001062154                           | 21%        |
| 19                                          | 55805(Entrez gene)  | Megalyn-binding protein                                    |                                                                                                                                                         | NP_001053077                           | 21%        |
| 20                                          | 122953(Entrez gene) | Jun dimerization protein 2                                 | Hemagglutinin                                                                                                                                           | NP_001044866                           | 19%        |
| 21                                          | Q9Y3C6              | Peptidyl prolyl isomerase like 1                           | Pro_isomerase Cyclophilin type peptidyl-prolyl <i>cis-trans</i> isomerase                                                                               | NP_001062502 (SIP12)                   | 63%        |
| Putative PRP45-interacting proteins (yeast) |                     |                                                            |                                                                                                                                                         |                                        |            |
| 1                                           | Q09882              | PRP45_SCHPO pre-mRNA-processing protein 45                 |                                                                                                                                                         | NP_001048184                           | 43%        |
| 2                                           | Q08817              | SOG2_YEAST, Leucine-rich repeat-containing protein SOG2    | Leucine-rich repeat                                                                                                                                     | NP_001062214                           | 17%        |
| 3                                           | Q06411              | SP382_YEAST, pre-mRNA-splicing factor SPP382               | G-patch domain                                                                                                                                          | NP_001067277                           | 17%        |

| No. | Accession no. | Description                                                                                 | Putative domains                                                                                            | Accession no.<br>(homologs in<br>rice) | Identities |
|-----|---------------|---------------------------------------------------------------------------------------------|-------------------------------------------------------------------------------------------------------------|----------------------------------------|------------|
| 4   | Q06091        | SN309_YEAST,<br>pre-mRNA-splicing factor<br>SNT309                                          |                                                                                                             |                                        |            |
| 5   | Q03654        | CEF1_YEAST,<br>pre-mRNA-splicing factor<br>CEF1                                             | Myb-like DNA-binding domain                                                                                 | NP_001052521                           | 31%        |
| 6   | Q02821        | IMA1_YEAST, Importin<br>subunit alpha                                                       | Armadillo/beta-catenin-like<br>repeat, Importin beta-binding<br>domain                                      | NP_001054692                           | 14%        |
| 7   | P46951        | YG4B_YEAST,<br>Uncharacterized protein<br>YGR198W                                           |                                                                                                             |                                        |            |
| 8   | P39964        | CEF1_SCHPO<br>pre-mRNA-splicing factor<br>cef1, <i>Schizosaccharomyces<br/>pombe</i>        | Myb-like DNA-binding domain                                                                                 | NP_001052521                           | 41%        |
| 9   | P38217        | IMB2_YEAST, Importin<br>subunit beta-2                                                      | HEAT repeat                                                                                                 | NP_001054359                           | 30%        |
| 10  | P32357        | AAR2_YEAST, A1<br>cistron-splicing factor AAR2                                              | AAR2 protein                                                                                                | NP_001052095                           | 22%        |
| 11  | P28320        | CWC16_YEAST, protein<br>CWC16                                                               | Family of unknown function<br>(DUF572)                                                                      | NP_001043437                           | 26%        |
| 12  | P04147        | PABP_YEAST,<br>polyadenylate-binding<br>protein, cytoplasmic and<br>nuclear                 | RNA recognition motif,<br>poly-adenylate-binding protein,<br>unique                                         | NP_001062583                           | 45%        |
| 13  | P32524        | PRP21_YEAST,<br>pre-mRNA-splicing factor<br>PRP21                                           | Surp module                                                                                                 | NP_001046418                           | 18%        |
| 14  | P32589        | HSP7F_YEAST, heat shock<br>protein homolog SSE1                                             | Hsp70 protein                                                                                               | NP_001042210                           | 38%        |
| 15  | P49955        | SF3B1_YEAST, U2 snRNP<br>component HSH155                                                   | HEAT repeat                                                                                                 | NP_001045883                           | 48%        |
| 16  | P32523        | PRP19_YEAST,<br>pre-mRNA-splicing factor 19                                                 | Prp19/Pso4-like                                                                                             | NP_001064804                           | 22%        |
| 17  | P32854        | PEP12_YEAST, syntaxin<br>PEP12                                                              | SNARE domain                                                                                                | NP_001042620                           | 29%        |
| 18  | Q06137        | YL345_YEAST, putative<br>6-phosphofructo-2-kinase/<br>fructose-2,6-biphosphatase<br>YLR345W | 6-phosphofructo-2-kinase,<br>phosphoglycerate mutase family                                                 | NP_001049815                           | 27%        |
| 19  | P33334        | PRP8_YEAST,<br>pre-mRNA-splicing factor 8                                                   | PROCN (NUC071) domain                                                                                       | NP_001054734                           | 62%        |
| 20  | P40968        | PRP17_YEAST,<br>pre-mRNA-processing factor<br>17                                            | WD domain, G-beta repeat                                                                                    | NP_001050302                           | 34%        |
| 21  | P36048        | SN114_YEAST, 114-kDa U5<br>small nuclear<br>ribonucleoprotein<br>component                  | Elongation factor Tu GTP-binding<br>domain, elongation factor G<br>C-terminus                               | NP_001058038                           | 33%        |
| 22  | P53131        | PRP43_YEAST,<br>pre-mRNA-splicing factor<br>ATP-dependent RNA<br>helicase PRP43             | Domain of unknown function,<br>helicase-associated domain (HA2),<br>helicase-conserved C-terminal<br>domain | NP_001049931                           | 62%        |
| 23  | P53333        | CWC22_YEAST,<br>pre-mRNA-splicing factor<br>CWC22                                           | MIF4G domain, MA3 domain                                                                                    | NP_001066507                           | 30%        |
| 24  | Q12046        | CWC2_YEAST,<br>pre-mRNA-splicing factor<br>CWC2                                             |                                                                                                             | NP_001059374                           | 20%        |
| 25  | Q12417        | PRP46_YEAST,<br>pre-mRNA-splicing factor<br>PRP46                                           | WD domain, G-beta repeat                                                                                    | NP_001050058                           | 43%        |



| No.                                                                              | Accession no. | Description                                                                                 | Putative domains                                                                     | Accession no.<br>(homologs in<br>rice) | Identities |
|----------------------------------------------------------------------------------|---------------|---------------------------------------------------------------------------------------------|--------------------------------------------------------------------------------------|----------------------------------------|------------|
| 26                                                                               | Q08963        | RU2A_YEAST, U2 small<br>nuclear ribonucleoprotein<br>A $\epsilon$                           |                                                                                      | NP_001046383                           | 26%        |
| 27                                                                               | P52868        | CWC23_YEAST,<br>pre-mRNA-splicing factor<br>CWC23                                           | DnaJ domain                                                                          | NP_001048897                           | 18%        |
| 28                                                                               | P32639        | BRR2_YEAST,<br>pre-mRNA-splicing helicase<br>BRR2                                           | Sec63 Brl domain, DEAD/DEAH box<br>helicase, helicase-conserved<br>C-terminal domain | NP_001049362                           | 29%        |
| 29                                                                               | Q06410        | ATG17_YEAST,<br>Autophagy-related protein<br>17                                             | Autophagy protein Apg17                                                              |                                        |            |
| 30                                                                               | Q04048        | SYF1_YEAST,<br>pre-mRNA-splicing factor<br>SYF1                                             |                                                                                      | NP_001060448                           | 23%        |
| 31                                                                               | Q12309        | CLF1_YEAST,<br>pre-mRNA-splicing factor<br>CLF1                                             | HAT (half-a-TPR) repeat, TPR<br>repeat                                               | NP_001055097                           | 36%        |
| 32                                                                               | Q04693        | RSE1_YEAST,<br>pre-mRNA-splicing factor<br>RSE1                                             | CPSF A subunit region                                                                | NP_001045829                           | 23%        |
| 33                                                                               | P10592        | HSP72_YEAST, heat shock<br>protein SSA2                                                     | Hsp70 protein                                                                        | NP_001055754                           | 72%        |
| 34                                                                               | O94084        | O94084_YEAST, Ylr338wp                                                                      |                                                                                      |                                        |            |
| Putative BX42-interacting<br>proteins ( <i>Drosophila</i> )                      |               |                                                                                             |                                                                                      |                                        |            |
| 1                                                                                | Q9VJE7        |                                                                                             | Protein phosphatase inhibitor 2<br>(IPP-2)                                           |                                        |            |
| 2                                                                                | Q9VCU7        |                                                                                             | Tudor domain                                                                         |                                        |            |
| 3                                                                                | Q9VB22        |                                                                                             | TPR repeat, GoLoco motif                                                             | NP_001048326                           | 15%        |
| 4                                                                                | Q06330        | SUH_HUMAN Recombining<br>binding protein suppressor<br>of hairless, <i>Homo sapiens</i>     |                                                                                      |                                        |            |
| 5                                                                                | P52485        | UBCD2_DROME<br>Ubiquitin-conjugating<br>enzyme E2-24 kDa,<br><i>Drosophila melanogaster</i> | Ubiquitin-conjugating enzyme                                                         | NP_001043763                           | 63%        |
| 6                                                                                | P46531        | NOTC1_HUMAN Neurogenic<br>locus notch homolog<br>protein 1 precursor, <i>H.<br/>sapiens</i> |                                                                                      | NP_001062603                           | 20%        |
| 7                                                                                | Q9VV87        | Q9VV87_DROME CG3971-PA,<br>isoform A, <i>D. melanogaster</i>                                | GNS1/SUR4 family                                                                     | NP_001051002                           | 23%        |
| 8                                                                                | Q9V4G9        |                                                                                             |                                                                                      | NP_001064999                           | 21%        |
| 9                                                                                | Q9V4M7        |                                                                                             |                                                                                      | NP_001051912                           | 44%        |
| 10                                                                               | Q9VKC5        | Q9VKC5_DROME<br>CG6770-PA, <i>D. melanogaster</i>                                           |                                                                                      |                                        |            |
| 11                                                                               | P19109        | RM62_DROME<br>ATP-dependent RNA<br>helicase p62, <i>D.<br/>melanogaster</i>                 | DEAD/DEAH box helicase,<br>helicase-conserved C-terminal<br>domain                   | NP_001042298                           | 53%        |
| 12                                                                               | P17886        | CRN_DROME Protein<br>crooked neCK, <i>D.<br/>melanogaster</i>                               | HAT (half-a-TPR) repeat, TPR<br>repeat                                               | NP_001055097                           | 54%        |
| 13                                                                               | O46052        | O46052_DROME EG:152A3.3<br>protein, <i>D. melanogaster</i>                                  |                                                                                      |                                        |            |
| Putative<br>CeSKIP-interacting<br>proteins ( <i>Caenorhabditis<br/>elegans</i> ) |               |                                                                                             |                                                                                      |                                        |            |



Table S5. Primers used in this study

|                           | Forward primer                       | Reverse primer                       |
|---------------------------|--------------------------------------|--------------------------------------|
| <i>SKIP-QTR</i>           | TACAGATGCGATCCAAGGTG                 | AGTGCCCTTAGCTTTGCTC                  |
| <i>Actin1</i>             | TGGCATCTCTCAGCACATTCC                | TGCACAATGGATGGGTCAGA                 |
| <i>SKIP-Y2H</i>           | <i>attB1</i> -CTCGTTCTACGACCACAGCAGC | <i>attB2</i> -GTGCATGGAGAACTTCTGAACA |
| <i>SKIP-ISH</i>           | CTAGCTTTTCTCTTCGATTC                 | AAGATGCCCTTGGAAAGTAGA                |
| <i>Hpt</i>                | CTGCTCCATACAAGCCAACC                 | TGACATTGGGGAGTTTAGCG                 |
| <i>SNAC1</i>              | CATGGTCCCGTTCTGAGGTG                 | CACACGTTGCAGCATCGATC                 |
| <i>04 g46440 (CBF2)</i>   | GAGCCCATGCTGTGGGATT                  | CGATCTAATACACGGAAGCATGAC             |
| <i>09 g15670 (PP2C)</i>   | CGCAGCTCCGACAACATCT                  | GCTGGGTGACTCTCTCTACAAG               |
| <i>06 g19800 (RD22)</i>   | GGAATGGATCATGGACGCC                  | GATGACGGAGCCCGGC                     |
| <i>11 g26760 (RAB16c)</i> | TTCCCGCCAGCACTAAAT                   | AAACTGCACGTACATCACGACAT              |
| <i>01 g40094 (ABI2)</i>   | TGGATCATCCCGTTTTCTG                  | TGGCCCAGCTTAACAAAAAGAAT              |
| <i>01 g22249 (POD)</i>    | AACGGAGTGAAGCAGCGT                   | CAGCACCTCTATGTTGCCCA                 |
| <i>09 g28210</i>          | GCTCCGAGCTTTTGTGGAC                  | GCCTACGGTGAATGAAACG                  |
| <i>10 g25230</i>          | ACACGTCAGCTTAATCCATAATT              | GAATAATCGTGACTGTACAAATGC             |
| <i>10 g25290</i>          | TGCCGATCGCGAGGAA                     | GGTTCGCTCGTTGTCGTGAT                 |
| <i>01 g03320</i>          | TGTTCTAGCTTGTTTCGTATTTCGTACA         | ACATAACACGCATACCAACATCAA             |
| <i>03 g08320</i>          | CAGCCTTGCCCTACCAGACATG               | GACGATCCTGTTCTTCTCTTCTC              |
| <i>06 g44190</i>          | CATGGTAGTCACATGGTGTGCTAGT            | CCGTTACTTACATACAGAGACGAACAG          |
| <i>03 g08310</i>          | TCGCCGAGCCTGACCTT                    | CGCGATAACTAGGGTAACTGCTAATC           |
| <i>02 g41954</i>          | CCGTGAACATATCCGGGC                   | CAAAGCGTGACGCTGCAA                   |
| <i>RAB21</i>              | CACACCACAGCAAGAGCTAAGTG              | TGGTGCTCCATCTGCTTAAG                 |
